# Supplementary material for: Lifestyle Factors, Colorectal Tumor Methylation, and Survival Among African Americans and European Americans
Source: PubMed Central journal article supplement (PMC6013500; doi:10.1038/s41598-018-27738-x), 2018-06-21
Supplement: 41598_2018_27738_MOESM1_ESM.pdf [file 41598_2018_27738_MOESM1_ESM.pdf]

## Lifestyle Factors, Colorectal Tumor Methylation, and Survival Among African Americans and European Americans

Evan L. Busch, Joseph A. Galanko, Robert S. Sandler, Ajay Goel, & Temitope O. Keku

### Supplementary Results: Survival Tables

**Supplementary Table 1a. Associations of colon tumor methylation of *CACNA1G*, *RUNX3*, and *SOCS1* with time to all-cause mortality in African Americans and European Americans**

| Group | <i>CACNA1G</i> |         |      |            | <i>RUNX3</i>  |          |      |            | <i>SOCS1</i>  |         |      |            |
|-------|----------------|---------|------|------------|---------------|----------|------|------------|---------------|---------|------|------------|
|       | Cut Point (%)  | n (%)   | HR   | 95% CI     | Cut Point (%) | n (%)    | HR   | 95% CI     | Cut Point (%) | n (%)   | HR   | 95% CI     |
| AA    | None           | --      | 0.99 | 0.96, 1.03 | None          | --       | 1.01 | 0.99, 1.03 | None          | --      | 0.97 | 0.88, 1.06 |
|       | <b>5</b>       | 74 (39) | 0.64 | 0.35, 1.16 | <b>3</b>      | 87 (53)  | 1.28 | 0.71, 2.32 | <b>3</b>      | 54 (46) | 0.64 | 0.31, 1.32 |
|       | <b>10</b>      | 48 (25) | 0.92 | 0.49, 1.73 | <b>6</b>      | 35 (21)  | 1.08 | 0.53, 2.19 | <b>6</b>      | 13 (11) | 0.61 | 0.14, 2.65 |
|       | <b>15</b>      | 32 (17) | 0.93 | 0.44, 1.95 | <b>9</b>      | 17 (10)  | 1.06 | 0.41, 2.77 | <b>9</b>      | 7 (6)   | 0.66 | 0.09, 5.03 |
|       | <b>20</b>      | 21 (11) | 0.89 | 0.37, 2.15 | <b>12</b>     | 13 (8)   | 1.39 | 0.52, 3.76 | <b>12</b>     | 5 (4)   | 0.94 | 0.12, 7.26 |
|       | <b>25</b>      | 12 (6)  | 0.79 | 0.24, 2.56 | <b>15</b>     | 11 (7)   | 1.71 | 0.62, 4.72 | <b>15</b>     | 4 (3)   | 0.94 | 0.12, 7.26 |
|       | <b>30</b>      | 8 (4)   | 1.26 | 0.38, 4.18 | <b>18</b>     | 10 (6)   | 1.95 | 0.69, 5.49 | <b>18</b>     | 4 (3)   | 0.94 | 0.12, 7.26 |
|       | <b>35</b>      | 5 (3)   | 1.23 | 0.28, 5.29 | <b>21</b>     | 8 (5)    | 2.89 | 0.98, 8.51 | <b>21</b>     | 4 (3)   | 0.94 | 0.12, 7.26 |
| EA    | None           | --      | 1.01 | 0.99, 1.03 | None          | --       | 1.01 | 0.99, 1.03 | None          | --      | 1.00 | 0.97, 1.04 |
|       | <b>5</b>       | 88 (38) | 1.28 | 0.75, 2.18 | <b>3</b>      | 119 (62) | 1.04 | 0.59, 2.05 | <b>3</b>      | 70 (47) | 1.57 | 0.80, 3.06 |
|       | <b>10</b>      | 52 (22) | 1.75 | 1.01, 3.04 | <b>6</b>      | 51 (26)  | 1.10 | 0.59, 2.05 | <b>6</b>      | 32 (21) | 1.62 | 0.78, 3.38 |
|       | <b>15</b>      | 43 (18) | 1.55 | 0.85, 2.82 | <b>9</b>      | 42 (22)  | 0.84 | 0.42, 1.70 | <b>9</b>      | 19 (13) | 0.91 | 0.31, 2.64 |
|       | <b>20</b>      | 31 (13) | 2.04 | 1.07, 3.89 | <b>12</b>     | 32 (17)  | 1.01 | 0.48, 2.11 | <b>12</b>     | 18 (12) | 0.96 | 0.33, 2.76 |
|       | <b>25</b>      | 29 (12) | 1.86 | 0.96, 3.61 | <b>15</b>     | 27 (14)  | 1.36 | 0.65, 2.85 | <b>15</b>     | 13 (9)  | 0.63 | 0.15, 2.68 |
|       | <b>30</b>      | 24 (10) | 1.40 | 0.67, 2.91 | <b>18</b>     | 26 (13)  | 1.39 | 0.66, 2.94 | <b>18</b>     | 12 (8)  | 0.66 | 0.15, 2.79 |
|       | <b>35</b>      | 16 (7)  | 1.03 | 0.40, 2.65 | <b>21</b>     | 24 (12)  | 1.27 | 0.58, 2.77 | <b>21</b>     | 12 (8)  | 0.66 | 0.15, 2.79 |

N (%) High=number (%) with methylation at or above the respective cut point. Cut point of “None” means continuous methylation measurements. Each estimate is the methylation marker estimate from a Cox model with a dependent variable of time from colon cancer diagnosis to all-cause mortality (censored at 5 years) and independent variables of methylation marker, age, sex, and lifestyle variables (fruits, vegetables, folate, and non-steroidal anti-inflammatory drugs, with each lifestyle variable dichotomized at the 75<sup>th</sup> percentile in the distribution of AA and EA combined).

AA=African Americans, EA=European Americans

**Supplementary Table 1b. Associations of colon tumor methylation of *MLHI* and *NEUROGI* with time to all-cause mortality in African Americans and European Americans**

| Group | <i>MLHI</i>   |               |                 | <i>NEUROGI</i> |               |                 |
|-------|---------------|---------------|-----------------|----------------|---------------|-----------------|
|       | Cut Point (%) | n (%)<br>High | HR<br>95% CI    | Cut Point (%)  | n (%)<br>High | HR<br>95% CI    |
| AA    | None          | --            | 0.94 0.87, 1.02 | None           | --            | 1.00 0.98, 1.01 |
|       | <b>1</b>      | 143 (77)      | 0.88 0.47, 1.65 | <b>10</b>      | 140 (73)      | 1.04 0.56, 1.94 |
|       | <b>2</b>      | 78 (42)       | 0.79 0.44, 1.40 | <b>15</b>      | 115 (60)      | 1.14 0.66, 1.98 |
|       | <b>4</b>      | 42 (23)       | 0.60 0.28, 1.28 | <b>20</b>      | 98 (51)       | 1.00 0.59, 1.71 |
|       | <b>6</b>      | 30 (16)       | 0.62 0.26, 1.47 | <b>25</b>      | 76 (40)       | 0.89 0.51, 1.56 |
|       | <b>8</b>      | 24 (13)       | 0.51 0.18, 1.44 | <b>30</b>      | 58 (30)       | 0.83 0.45, 1.51 |
|       | <b>10</b>     | 20 (11)       | 0.48 0.15, 1.56 | <b>35</b>      | 43 (22)       | 0.48 0.22, 1.04 |
|       | <b>12</b>     | 16 (9)        | 0.43 0.10, 1.77 | <b>40</b>      | 27 (14)       | 0.76 0.34, 1.72 |
|       | <b>14</b>     | 9 (5)         | . .             | <b>45</b>      | 18 (9)        | 0.77 0.30, 1.96 |
|       | <b>16</b>     | 8 (4)         | . .             | <b>50</b>      | 9 (5)         | 1.10 0.34, 3.64 |
| EA    | None          | --            | 1.02 0.98, 1.05 | None           | --            | 1.00 0.98, 1.02 |
|       | <b>1</b>      | 175 (77)      | 0.98 0.52, 1.83 | <b>10</b>      | 161 (69)      | 0.79 0.45, 1.39 |
|       | <b>2</b>      | 106 (46)      | 0.90 0.53, 1.51 | <b>15</b>      | 141 (60)      | 1.04 0.60, 1.80 |
|       | <b>4</b>      | 48 (21)       | 1.11 0.59, 2.06 | <b>20</b>      | 119 (51)      | 1.13 0.67, 1.93 |
|       | <b>6</b>      | 28 (12)       | 1.13 0.55, 2.35 | <b>25</b>      | 97 (41)       | 1.17 0.68, 1.99 |
|       | <b>8</b>      | 26 (11)       | 1.34 0.64, 2.80 | <b>30</b>      | 75 (32)       | 0.98 0.55, 1.75 |
|       | <b>10</b>     | 20 (9)        | 1.28 0.57, 2.91 | <b>35</b>      | 58 (25)       | 0.96 0.51, 1.81 |
|       | <b>12</b>     | 16 (7)        | 1.44 0.60, 3.47 | <b>40</b>      | 43 (18)       | 1.19 0.61, 2.33 |
|       | <b>14</b>     | 13 (6)        | 1.60 0.62, 4.09 | <b>45</b>      | 27 (12)       | 1.28 0.57, 2.85 |
|       | <b>16</b>     | 12 (5)        | 1.70 0.66, 4.37 | <b>50</b>      | 17 (7)        | 1.38 0.54, 3.49 |

N (%) High=number (%) with methylation at or above the respective cut point. Cut point of “None” means continuous methylation measurements. Each estimate is the methylation marker estimate from a Cox model with a dependent variable of time from colon cancer diagnosis to all-cause mortality (censored at 5 years) and independent variables of methylation marker, age, sex, and lifestyle variables (fruits, vegetables, folate, and non-steroidal anti-inflammatory drugs, with each lifestyle variable dichotomized at the 75<sup>th</sup> percentile in the distribution of AA and EA combined).

AA=African Americans, EA=European Americans
